# Supplementary material for: Genome-wide characterization of the Zn(II)2Cys6 zinc cluster-encoding gene family in Pleurotus ostreatus and expression analyses of this family during developmental stages and under heat stress
Source: PeerJ. 2020 Jun 12;8:e9336. doi: 10.7717/peerj.9336 (PMC7295025; doi:10.7717/peerj.9336)
Supplement: Supplemental Information 1 [file peerj-08-9336-s001.xlsx]

## Sheet: Sheet1
Table S1. Pfam models used to annotate transcription factors in P. ostreatus
Pfam.ID	Description
PF00010	Helix-loop-helix DNA-binding domain
PF00046	Homeodomain
PF00096	Zinc finger, C2H2 type
PF00170	bZIP transcription factor
PF00172	Fungal Zn(2)-Cys(6) binuclear cluster domain
PF00249	Myb-like DNA-binding domain
PF00250	Forkhead domain
PF00319	SRF-type transcription factor (DNA-binding and dimerisation domain)
PF00320	GATA zinc finger
PF00352	Transcription factor TFIID (or TATA-binding protein, TBP)
PF00447	HSF-type DNA-binding
PF00505	HMG (high mobility group) box
PF00649	Copper fist DNA binding domain
PF00808	Histone-like transcription factor (CBF/NF-Y) and archaeal histone
PF00989	PAS fold
PF01125	G10 protein
PF01381	Helix-turn-helix
PF01388	ARID/BRIGHT DNA binding domain
PF01422	NF-X1 type zinc finger
PF02002	TFIIE alpha subunit
PF02045	CCAAT-binding transcription factor (CBF-B/NF-YA) subunit B
PF02178	AT hook motif
PF02200	STE like transcription factor
PF02257	RFX DNA-binding domain
PF02268	Transcription initiation factor IIA, gamma subunit, helical domain
PF02671	Paired amphipathic helix repeat
PF02751	Transcription initiation factor IIA, gamma subunit
PF02791	DDT domain
PF02891	MIZ/SP-RING zinc finger
PF02928	C5HC2 zinc finger
PF03343	SART-1 family
PF03660	PHF5-like protein
PF03847	Transcription initiation factor TFIID subunit A
PF03849	Transcription factor Tfb2
PF03914	CBF/Mak21 family
PF04054	CCR4-Not complex component, Not1
PF04082	Fungal specific transcription factor domain
PF04153	NOT2 / NOT3 / NOT5 family
PF04218	CENP-B N-terminal DNA-binding domain
PF04299	Putative FMN-binding domain
PF04855	SNF5 / SMARCB1 / INI1
PF04910	Transcriptional repressor TCF25
PF05179	RNA pol II accessory factor, Cdc73 family, C-terminal
PF05764	YL1 nuclear protein
PF07093	SGT1 protein
PF07544	RNA polymerase II transcription mediator complex subunit 9
PF07716	Basic region leucine zipper
PF07741	Brf1-like TBP-binding domain
PF07975	TFIIH C1-like domain
PF08164	Apoptosis-antagonizing transcription factor, C-terminal
PF08295	Sin3 family co-repressor
PF08523	Multiprotein bridging factor 1
