# Supplementary material for: Genome-wide characterization of the Zn(II)2Cys6 zinc cluster-encoding gene family in Pleurotus ostreatus and expression analyses of this family during developmental stages and under heat stress
Source: PeerJ. 2020 Jun 12;8:e9336. doi: 10.7717/peerj.9336 (PMC7295025; doi:10.7717/peerj.9336)
Supplement: Supplemental Information 2 [file peerj-08-9336-s002.xlsx]

## Sheet: Sheet1
Table S2. Primer sequences of selected genes for RT-qPCR
Primer names	Sequences (5’-3’)	Amplicon length (bp)	Efficiency(%)	R2
Beta_actin_F	AGTCGGTGCCTTGGTTAT	129	104	0.999
Beta_actin_R	ATACCGACCATCACACCT
Beta_tubulin_F	AGGCTTTCTTGCATTGGTACACGC	136	101	0.998
Beta_tubulin_R	TATTCGCCTTCTTCCTCATCGGCA
PoZCP07_F	CGCCTATCCTTATTCTCGCTATG	149	102	0.997
PoZCP07_R	TGCTCATTGGAATCGCTAGG
PoZCP15_F	TCCCGTTCAAGGCAAGATG	132	99	0.999
PoZCP15_R	ATGAAAGATCTGGGCGTCG
PoZCP22_F	AATGGGATGAGGAACTTGGAG	146	101	0.996
PoZCP22_R	GCCACTTCTGCGTTAGGATAC
PoZCP26_F	CTGTGCCGACCAGTTTGCTA	81	103	0.997
PoZCP26_R	GGCCAGGAATTGGCTTTTCG
PoZCP27_F	AGGAATCGCATAGCTGAACTC	128	97	1
PoZCP27_R	GATTTTGATGCCCGAGAGTG
PoZCP31_F	CGTACAGTCGAGTTTGCCTTG	148	99	0.998
PoZCP31_R	AGATGTTGAATTGGCCTGAGG
PoZCP34_F	CTTGGCCGTCAGAAGTAGATAG	141	105	0.999
PoZCP34_R	TTGGCGAATAGAGCAGGAAG
PoZCP39_F	GCCTCGGTCCCTAATTCTTTC	148	100	0.997
PoZCP39_R	AGGATTTACAATGAACACAAGCG
PoZCP46_F	TTGACCGGCTTATGTGTATACG	139	97	0.998
PoZCP46_R	ATCGAGGATGTGGCTTGTTC
PoZCP47_F	ACTAAGCTTTGCCCTCACTG	87	98	1
PoZCP47_R	CAGCCTTTCGTTTGTATGCG
PoZCP40_F	CCATCAAAGATAGGCAACGC	124	102	0.999
PoZCP40_R	GTCGGCATATTCACAGGAGAG
PoZCP10_F	TGGAAGTTTCGGTCAGAGC	142	104	0.995
PoZCP10_R	AATCAGTGGCACGAAGTAGG
PoZCP59_F	TTTTACCGAACCCCAGAGC	122	100	0.996
PoZCP59_R	CAGACCTCTAGTGATGCAGC
