# Supplementary material for: Genome-wide characterization of the Zn(II)2Cys6 zinc cluster-encoding gene family in Pleurotus ostreatus and expression analyses of this family during developmental stages and under heat stress
Source: PeerJ. 2020 Jun 12;8:e9336. doi: 10.7717/peerj.9336 (PMC7295025; doi:10.7717/peerj.9336)
Supplement: Supplemental Information 4 [file peerj-08-9336-s004.xlsx]

## Sheet: Sheet1
Table S4. FPKM values of the PoZCP genes during different developmental stages in P. ostreatus produced by RNA-seq.
Gene ID	Mycelia	Primordium	Fruiting body
PoZCP01	134.573	38.7797	38.695
PoZCP02	8.05293	5.85178	16.9426
PoZCP03	1.03594	3.6666	8.20091
PoZCP04	39.6988	24.1177	59.1928
PoZCP05	9.16914	4.91133	5.62372
PoZCP06	35.1671	10.7947	21.4713
PoZCP07	5.3878	13.9592	4.72203
PoZCP08	8.37469	10.8925	5.55482
PoZCP09	78.3789	103.694	45.192
PoZCP10	13.6566	20.3591	116.777
PoZCP11	21.5485	18.3555	10.1689
PoZCP12	27.2564	8.31565	5.4707
PoZCP13	29.5885	15.4784	16.3009
PoZCP14	0	0	0
PoZCP15	54.6381	47.9829	81.9479
PoZCP16	80.9446	57.0254	18.0514
PoZCP17	134.496	15.5793	35.2138
PoZCP18	69.4654	35.2615	26.6957
PoZCP19	0.96751	1.66601	1.32918
PoZCP20	128.114	192.407	174.482
PoZCP21	21.61	11.4254	9.66238
PoZCP22	14.9184	7.67652	5.32736
PoZCP23	2.62756	6.483	2.60493
PoZCP24	44.2163	51.2395	44.1985
PoZCP25	14.6076	22.5155	16.3066
PoZCP26	4.78455	79.3244	205.998
PoZCP27	41.9121	71.6992	12.2832
PoZCP28	29.3089	22.2947	22.4209
PoZCP29	4.82221	9.65965	3.138
PoZCP30	54.9903	67.6564	37.7473
PoZCP31	9.57485	185.114	184.382
PoZCP32	150.254	43.7705	18.4357
PoZCP33	64.1172	7.01196	2.39577
PoZCP34	2.17107	6.57784	4.52723
PoZCP35	82.5674	20.3852	8.40059
PoZCP36	11.8095	13.6507	15.4574
PoZCP37	31.0093	29.2569	31.4994
PoZCP38	44.8139	39.6421	79.6601
PoZCP39	20.6796	4.93157	4.31222
PoZCP40	0.38048	0.631146	33.4285
PoZCP41	0.645781	61.9109	7.32561
PoZCP42	44.9854	31.8848	35.0997
PoZCP43	31.1516	52.1031	39.1131
PoZCP44	38.6613	37.9516	30.3701
PoZCP45	25.0893	13.8296	23.9167
PoZCP46	9.19201	18.9546	9.55331
PoZCP47	18.1988	12.0008	18.5146
PoZCP48	58.2236	89.6659	72.0725
PoZCP49	5.40251	10.6584	9.11853
PoZCP50	30.6042	47.2493	23.3767
PoZCP51	26.9848	29.6174	18.5361
PoZCP52	34.0889	37.0812	38.0336
PoZCP53	25.6499	16.931	9.22907
PoZCP54	109.865	107.331	118.406
PoZCP55	45.1011	39.9371	57.3861
PoZCP56	64.9907	38.0497	34.2924
PoZCP57	78.7776	137.175	163.72
PoZCP58	10.158	12.6644	9.94794
PoZCP59	1.07372	62.382	57.276
PoZCP60	269.298	136.097	100.47
PoZCP61	72.9692	72.5845	58.9488
PoZCP62	29.8583	33.1758	42.0351
PoZCP63	43.8221	44.8826	39.7629
PoZCP64	47.7362	57.3777	75.5112
PoZCP65	18.3259	4.72811	9.7673
PoZCP66	52.2215	39.2731	111.29
