# Supplementary material for: Genome-wide characterization of the Zn(II)2Cys6 zinc cluster-encoding gene family in Pleurotus ostreatus and expression analyses of this family during developmental stages and under heat stress
Source: PeerJ. 2020 Jun 12;8:e9336. doi: 10.7717/peerj.9336 (PMC7295025; doi:10.7717/peerj.9336)
Supplement: Supplemental Information 5 [file peerj-08-9336-s005.xlsx]

## Sheet: Sheet1
Table S5. FPKM values of the PoZCP genes under heat stress at different time points in P. ostreatus produced by RNA-seq.
Gene ID	Heat_0h	Heat_0.5h	Heat_1h	Heat_2h	Heat_3h
PoZCP01	66.4806	53.5466	51.6375	62.9972	63.0205
PoZCP02	7.34488	5.66862	4.84404	6.27828	7.44248
PoZCP03	1.26466	1.09434	1.1633	0.906873	1.34811
PoZCP04	38.2221	34.474	34.556	38.4902	39.5426
PoZCP05	3.86519	4.27247	3.89556	2.94729	4.30857
PoZCP06	31.0132	23.7012	22.2137	23.9913	29.3501
PoZCP07	7.7823	13.357	18.8451	13.8946	11.34
PoZCP08	6.08798	4.45719	4.59006	6.27983	6.00365
PoZCP09	82.6178	99.3713	74.6064	100.647	113.525
PoZCP10	7.08021	6.05765	8.57551	5.2745	3.57845
PoZCP11	5.25685	3.62486	3.39489	3.53399	3.57845
PoZCP12	15.8521	21.419	23.8362	16.2777	17.7096
PoZCP13	22.7782	22.1137	21.5476	21.3706	22.5883
PoZCP14	0	0	0	0	0
PoZCP15	17.9581	120.962	104.279	19.3087	19.8013
PoZCP16	74.6285	41.6684	42.463	59.1347	61.564
PoZCP17	66.1136	88.3245	90.2407	103.633	109.492
PoZCP18	50.952	42.1399	44.4001	56.8183	70.6552
PoZCP19	2.13032	1.76378	1.5616	1.46031	1.60368
PoZCP20	76.2817	56.0227	65.7751	116.947	112.895
PoZCP21	17.4963	19.0122	13.3317	17.3746	17.9812
PoZCP22	11.0221	8.39721	5.44877	6.7399	6.30981
PoZCP23	1.86643	1.2678	1.45627	1.46708	1.74663
PoZCP24	55.1696	52.3278	39.0091	44.193	47.735
PoZCP25	13.9454	10.9919	9.81231	13.0639	12.8069
PoZCP26	1.30985	88.4836	145.933	1.72774	1.49916
PoZCP27	45.5615	31.3781	15.4911	23.3254	23.44
PoZCP28	18.8078	18.4175	17.8209	21.6911	21.9373
PoZCP29	5.37327	6.01519	5.14135	4.48112	4.83275
PoZCP30	42.5993	37.8699	41.3598	54.3607	49.4805
PoZCP31	6.46115	116.113	89.3455	14.4535	12.4906
PoZCP32	45.1963	22.1131	24.6728	44.5837	49.2824
PoZCP33	12.1403	9.21636	8.72587	10.0514	9.54697
PoZCP34	3.59998	8.05816	8.24781	4.56746	3.49826
PoZCP35	98.4362	85.3473	110.895	84.4154	80.3005
PoZCP36	15.1266	15.7958	13.6573	15.9078	14.5926
PoZCP37	20.3489	17.0374	24.6473	21.6994	23.2258
PoZCP38	31.687	24.57	28.8307	35.1171	34.8222
PoZCP39	37.5399	55.9605	68.7442	33.8799	37.9371
PoZCP40	0.603003	0.376972	0.46918	0.941246	1.09046
PoZCP41	1.9535	2.72348	1.16006	0.736206	0.942104
PoZCP42	39.8288	44.3407	37.4631	33.2077	33.1555
PoZCP43	25.2746	17.7983	20.1732	26.7722	29.8488
PoZCP44	27.3639	23.5497	22.6657	24.7936	20.5336
PoZCP45	21.0799	22.6745	21.038	23.9831	23.216
PoZCP46	13.8645	21.1208	38.4375	10.3787	11.4714
PoZCP47	7.01597	16.2446	23.3618	9.31408	8.13856
PoZCP48	76.0675	44.3791	35.4328	46.0895	53.773
PoZCP49	9.55614	7.47095	6.38544	8.69043	7.93865
PoZCP50	17.9863	20.6742	24.5012	21.8205	19.4005
PoZCP51	22.9483	15.83	17.9134	20.238	18.733
PoZCP52	46.1207	53.08	53.8803	33.3113	34.4486
PoZCP53	23.2618	29.6898	19.2228	21.1742	20.0356
PoZCP54	89.448	94.5611	89.839	112.129	101.618
PoZCP55	29.6168	23.2601	28.0272	31.2971	33.1896
PoZCP56	35.4667	30.9598	28.7865	32.521	32.5891
PoZCP57	86.3638	55.9795	43.7855	63.1199	64.4833
PoZCP58	16.8174	12.6328	8.71783	16.1567	15.5344
PoZCP59	0.201443	0.314616	0.145473	0.232501	0.195314
PoZCP60	97.9933	101.487	124.286	95.7761	85.9885
PoZCP61	27.6548	25.737	30.2758	35.55	32.2043
PoZCP62	28.8069	22.1331	26.4592	29.3471	28.3741
PoZCP63	23.0315	20.1483	21.5029	25.2421	23.9051
PoZCP64	24.9902	22.5581	21.6944	22.5177	23.7168
PoZCP65	17.8559	18.229	15.8054	20.0306	21.7608
PoZCP66	50.4382	47.8717	42.9562	50.1477	51.6035
